# Supplementary material for: Highly efficient large-scale preparation and electromagnetic property control of silica–NiFeP double shell composite hollow particles
Source: Royal Society of Chemistry journal article supplement (doi:10.1039/c7ra02710a), 2017-01-01
Supplement: c7ra02710a1.pdf [file c7ra02710a1.pdf]

Supplementary information for :

## High efficient large-scale preparation and electromagnetic property control of silica-NiFeP double shell composite hollow particles

Bin Liao,<sup>a,b</sup> Zhenguo An,<sup>\*a</sup> Jingjie Zhang<sup>\*,a</sup>

<sup>a</sup>Technical Institute of Physics and Chemistry, Chinese Academy of Sciences, Beijing 100190 China.

<sup>b</sup>University of Chinese Academy of Sciences, Beijing 100049 , P. R. China.

| Agents and factors (alkaline solution)                                               | S1   |        |        |        | S2   |        |        |        | S3   |        |        |        |
|--------------------------------------------------------------------------------------|------|--------|--------|--------|------|--------|--------|--------|------|--------|--------|--------|
| NiSO <sub>4</sub> ·6H <sub>2</sub> O                                                 | 66.6 |        |        |        | 44.7 |        |        |        | 33.5 |        |        |        |
| (NH <sub>4</sub> ) <sub>2</sub> Fe(SO <sub>4</sub> ) <sub>2</sub> ·6H <sub>2</sub> O | 0    |        |        |        | 33.3 |        |        |        | 50   |        |        |        |
| NaH <sub>2</sub> PO <sub>2</sub> ·H <sub>2</sub> O                                   | 25   |        |        |        | 25   |        |        |        | 25   |        |        |        |
| (NH <sub>4</sub> ) <sub>2</sub> SO <sub>4</sub>                                      | 10   |        |        |        | 10   |        |        |        | 10   |        |        |        |
| KNaC <sub>4</sub> H <sub>4</sub> O <sub>6</sub> ·4H <sub>2</sub> O                   | 75   |        |        |        | 75   |        |        |        | 75   |        |        |        |
| NH <sub>2</sub> CH <sub>2</sub> COOH                                                 | 10   |        |        |        | 10   |        |        |        | 10   |        |        |        |
| PEG                                                                                  | 10   |        |        |        | 10   |        |        |        | 10   |        |        |        |
| pH value                                                                             | 9    |        |        |        | 9    |        |        |        | 9    |        |        |        |
| temperature/°C                                                                       | 70   |        |        |        | 70   |        |        |        | 70   |        |        |        |
| Mole ratio(Fe <sup>2+</sup> /(Fe <sup>2+</sup> +Ni <sup>2+</sup> ))                  | 0    |        |        |        | 1:3  |        |        |        | 1:2  |        |        |        |
| Sample Names                                                                         | S11  | S12    | S13    | S14    | S21  | S22    | S23    | S24    | S31  | S32    | S33    | S34    |
| Volume of solution(mL)                                                               | 400  | 300    | 200    | 100    | 400  | 300    | 200    | 100    | 400  | 300    | 200    | 100    |
| Mass of seeds(g)                                                                     | 4g   | 3/4S11 | 2/3S12 | 1/2S13 | 4g   | 3/4S21 | 2/3S22 | 1/2S23 | 4g   | 3/4S31 | 2/3S32 | 1/2S33 |

**Table S1** Detailed chemical agent concentrations (g/L) and reaction conditions for different samples.

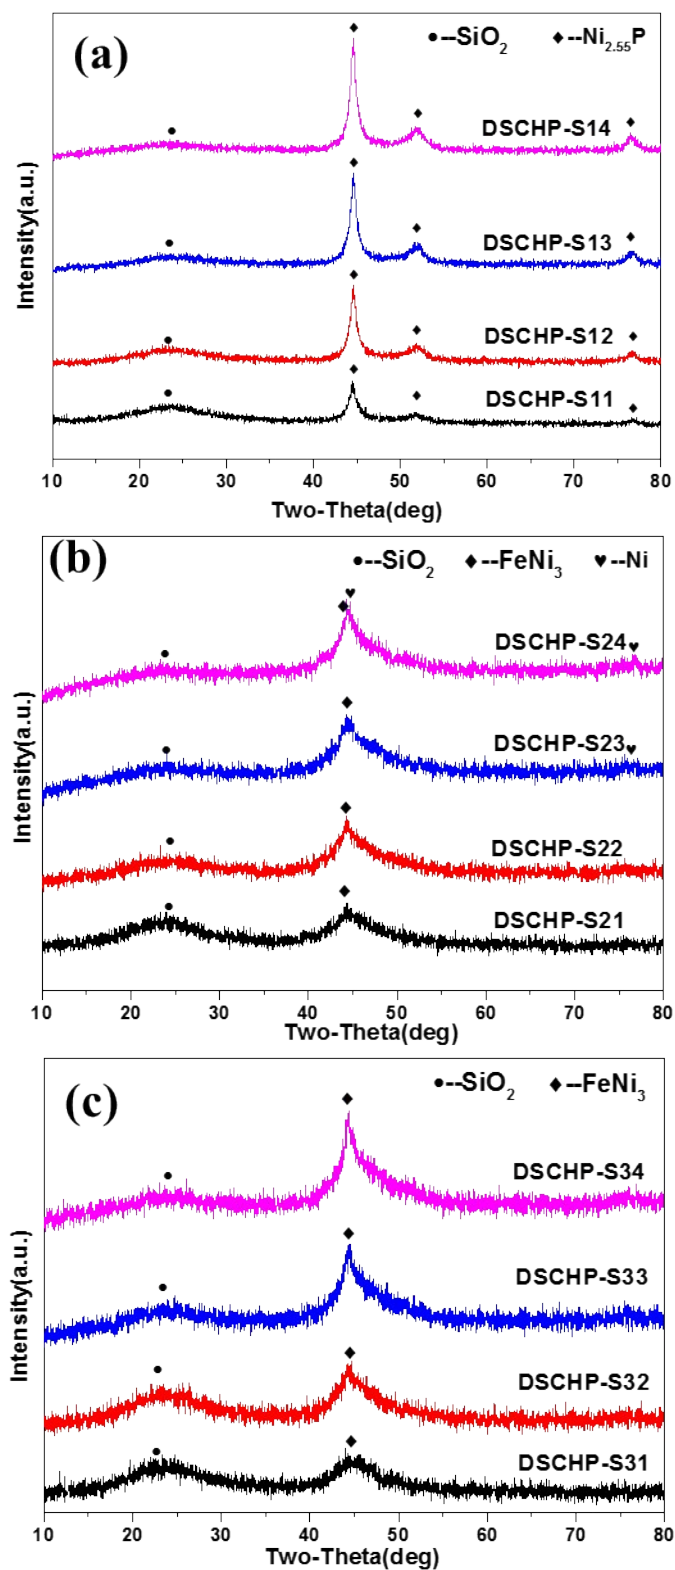

Fig. S1 XRD patterns of (a) DSCHP-S1, (b) DSCHP-S2 and (c) DSCHP-S3 with different plating times

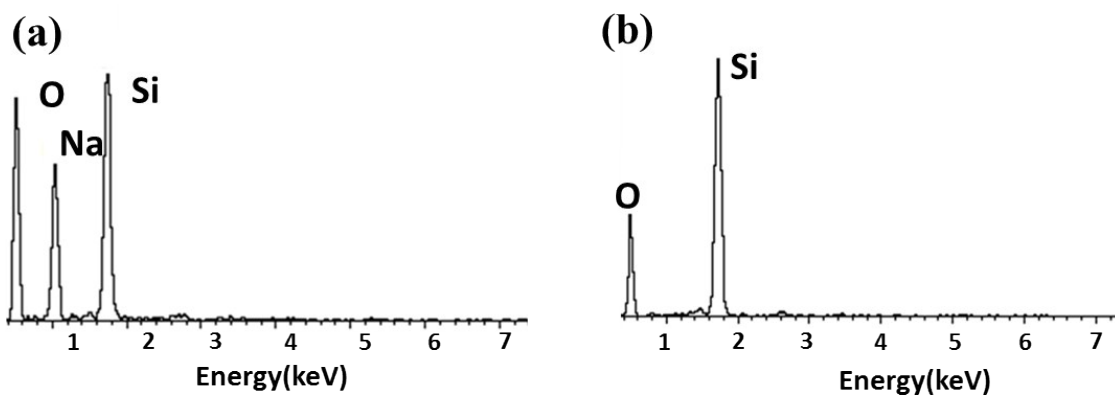

**Fig. S2** EDX spectra of the obtained hollow particles with treatment (a) silane coupling and (b) sensitization

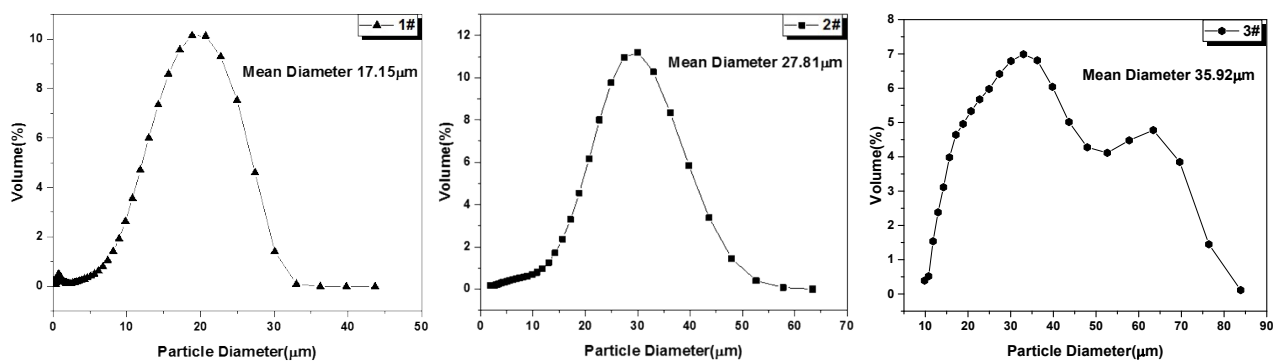

**Fig. S3** Particle size distribution of obtained SSHPs with different parameter of spray drying.

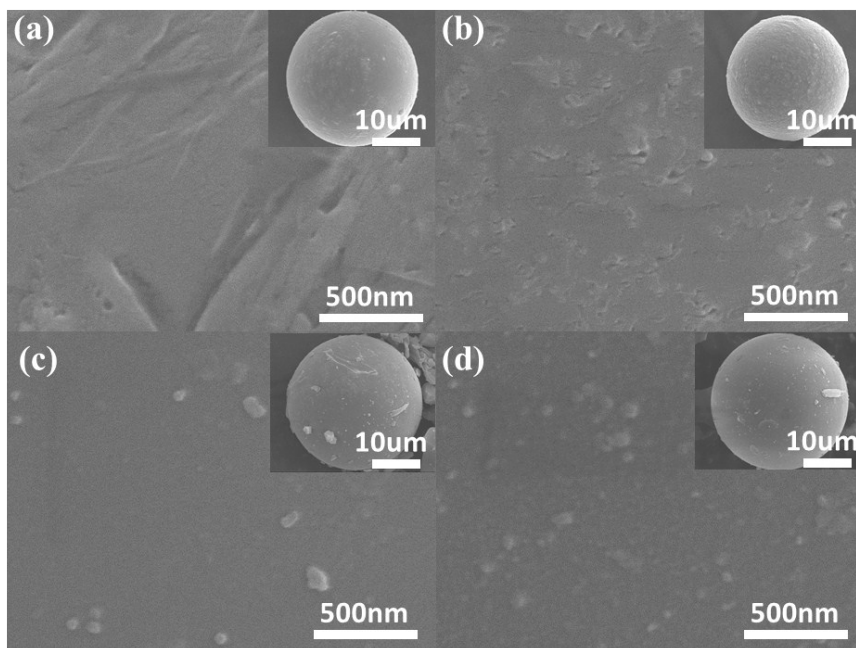

**Fig. S4** SEM images of the hollow particles at different stage of pretreatments. (a) the pristine SSHPs, SSHPs obtained after silane coupling (b), sensitization (c) and activation (d).

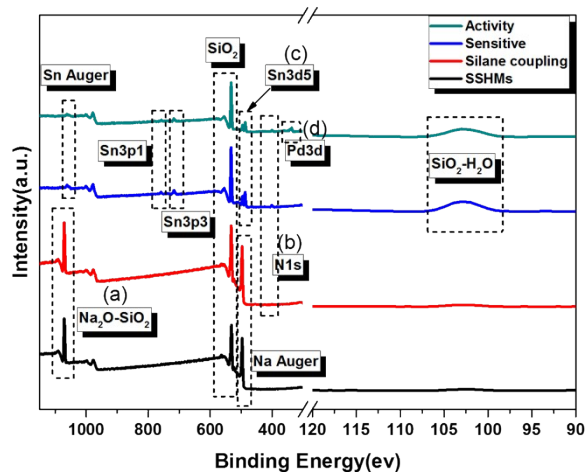

**Fig. S5** XPS spectra of the SSHPs samples at different stage of pretreatment: (a) pristine SSHPs, (b) SSHPs after silane coupling, (c) SSHPs after activation.

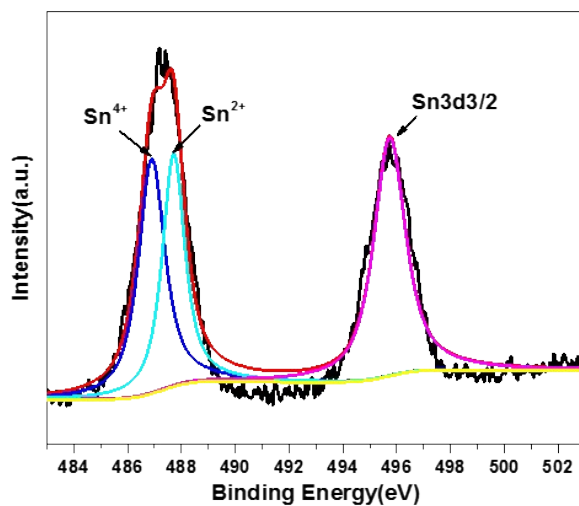

**Fig. S6** XPS spectra of Sn3d for SSHPs after activation.

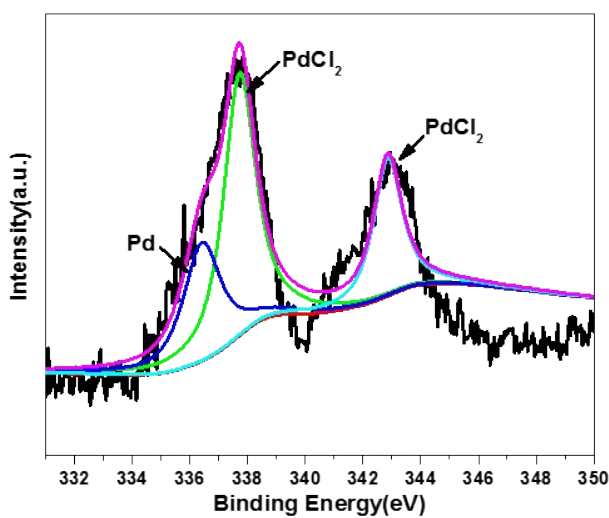

**Fig. S7** XPS spectra of Pd3d for SSHPs after activation.

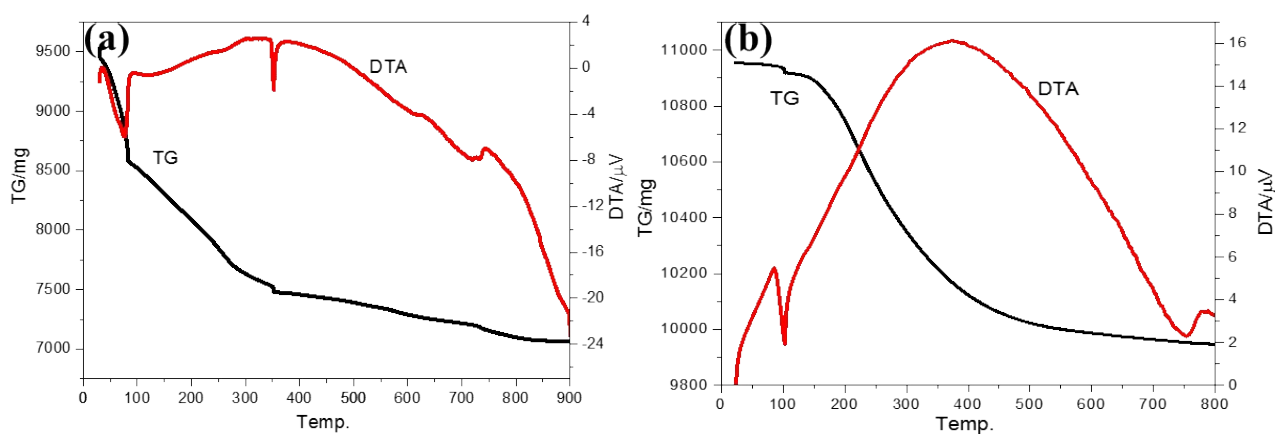

**Fig. S8** TG-DTA curves of (a) SSHPs and (b) ASHPs.

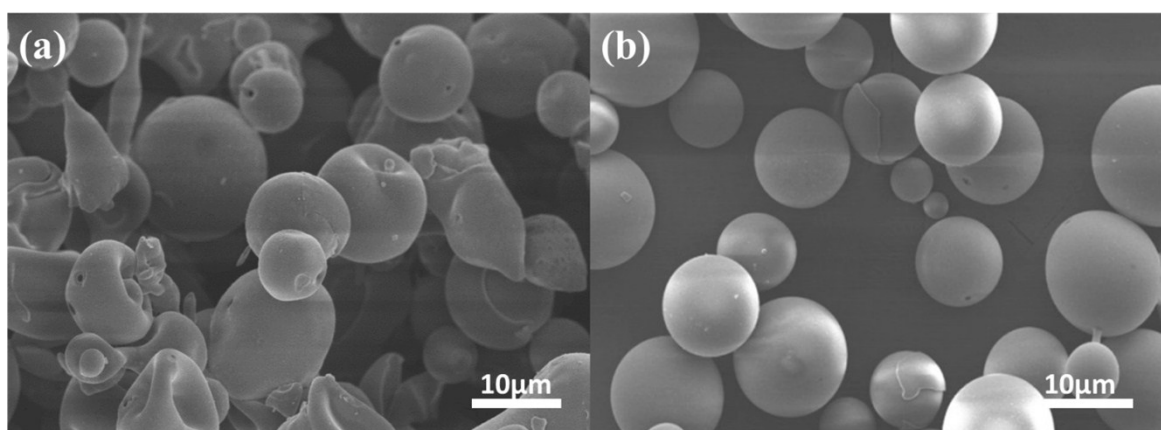

**Fig. S9** SEM images of the pristine SSHPs calcinated at 400°C (a) and the ASHPs calcinated at 1300°C (b).

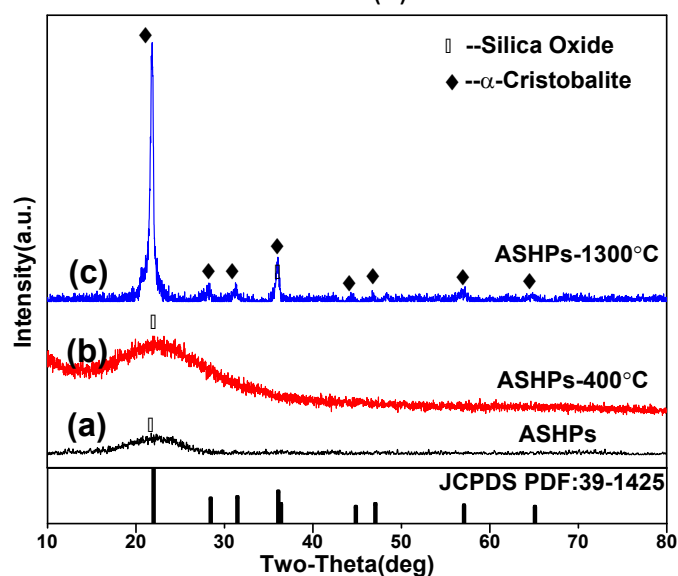

**Fig. S10** XRD patterns of the ASHPs with heat treatment: (a)ASHPs, (b)400°C, and (c)1300°C

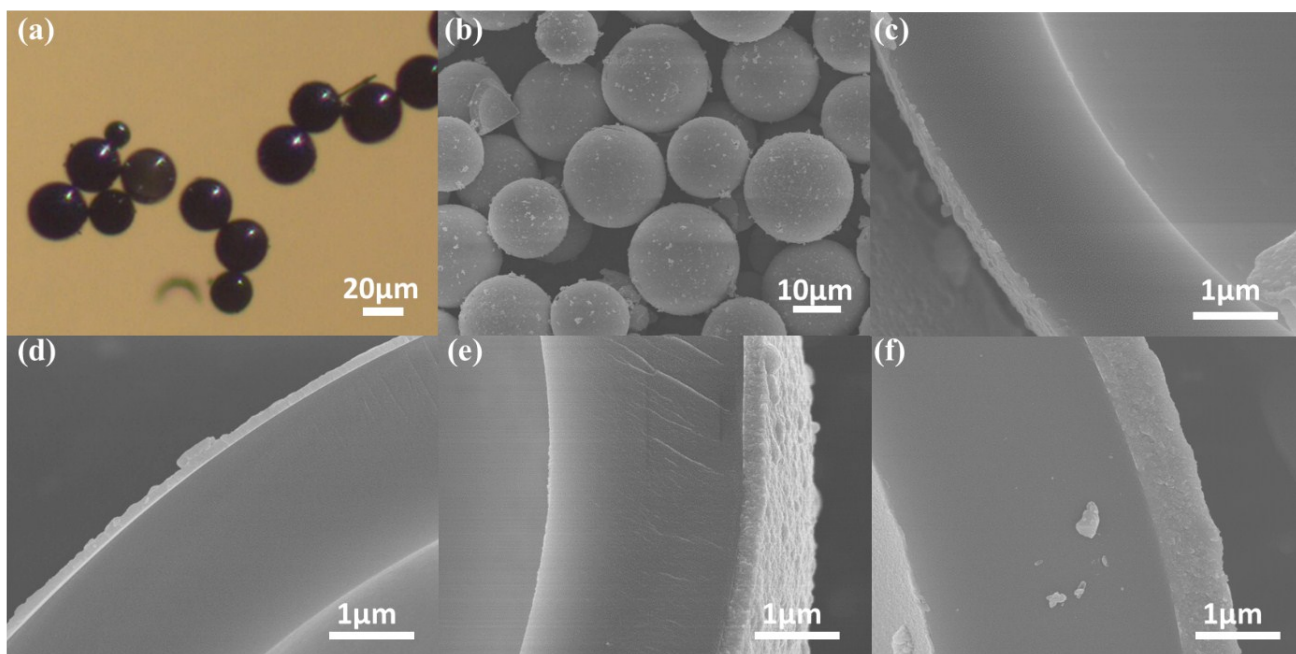

**Fig. S11** (a) Optical microscopy image of DSCHP-S11 and SEM images of (b), (c) DSCHP-S11, (d) DSCHP-S12, (e)DSCHP-S13, (f)DSCHP-S14.

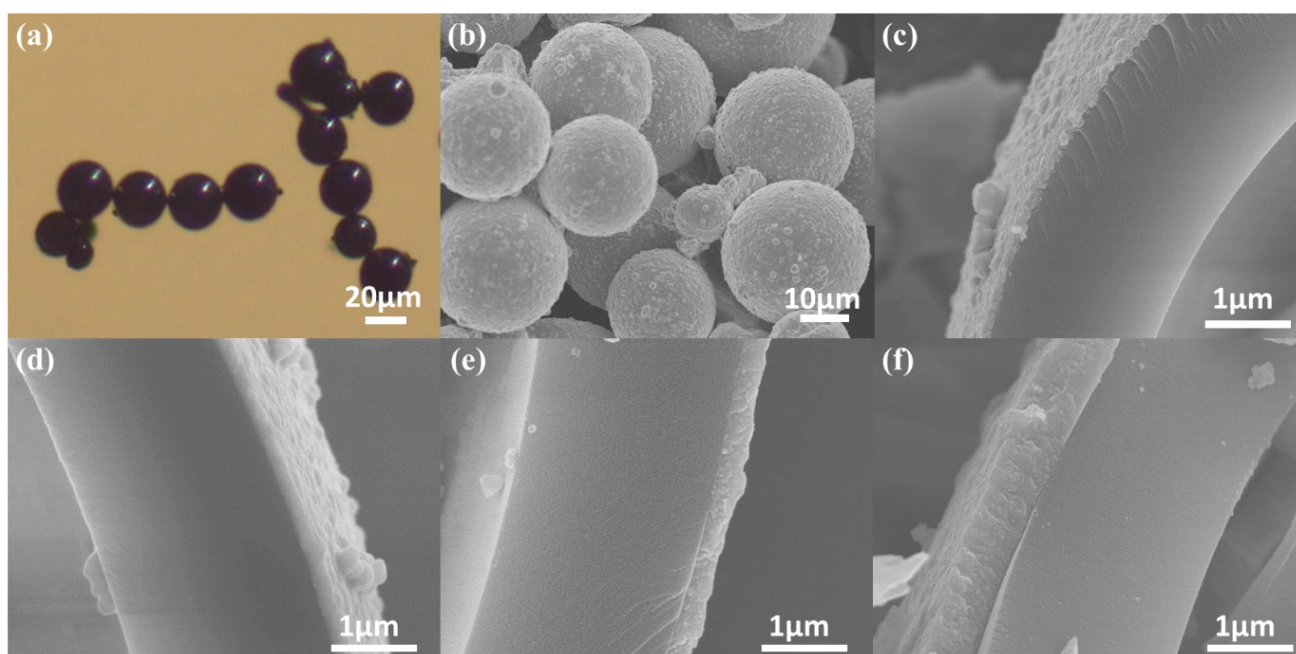

**Fig. S12** (a) Optical microscopy image of DSCHP-S31 and SEM images of (b), (c) DSCHP-S31, (d) DSCHP-S32, (e)DSCHP-S33, (f)DSCHP-S34.

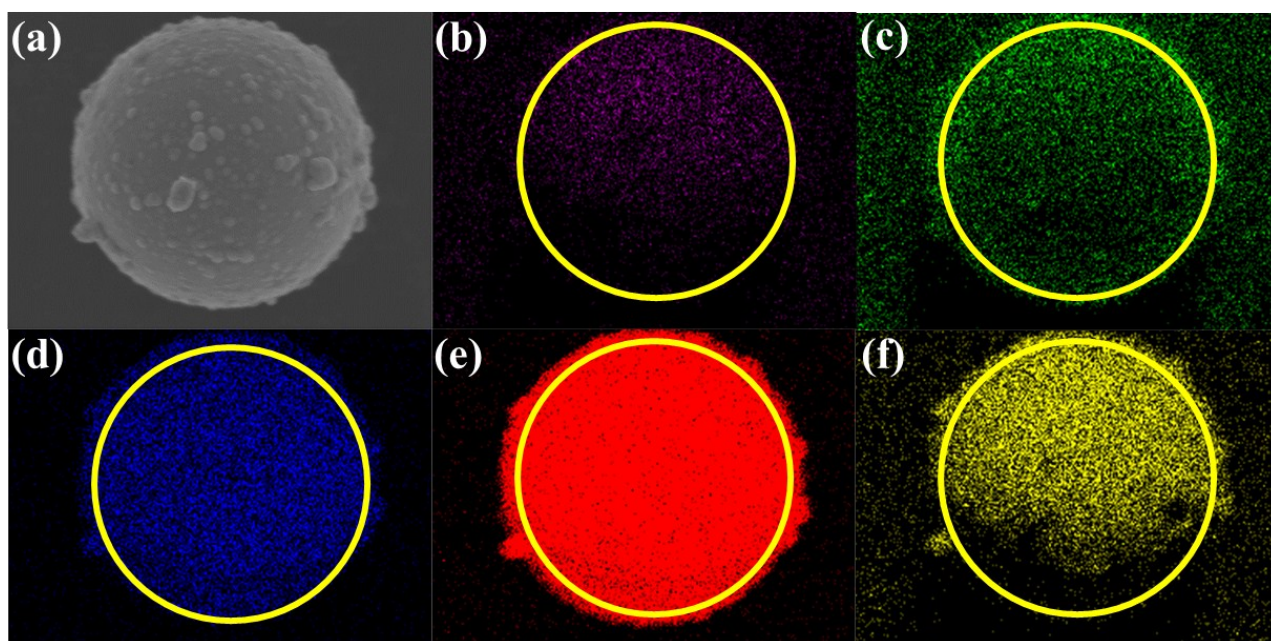

**Fig. 13** SEM (a) image and the corresponding EDX element mapping of (b) Si, (c) O, (d) Fe and (e) Ni, and (f) P taken on a single particle of the as-obtained DSCHP-S23.

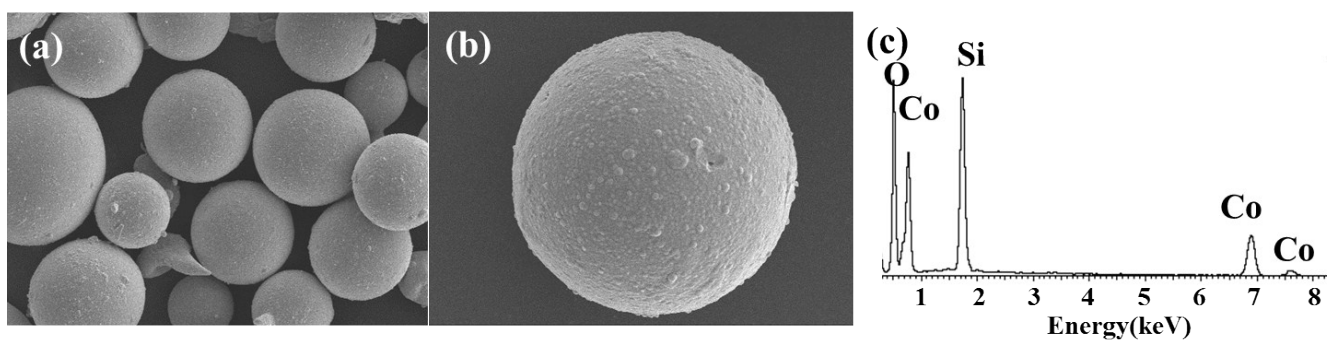

**Fig. S14** (a), (b) SEM images and (c) EDX spectra of the as-obtained  $\text{SiO}_2$ -Co composite hollow particles.

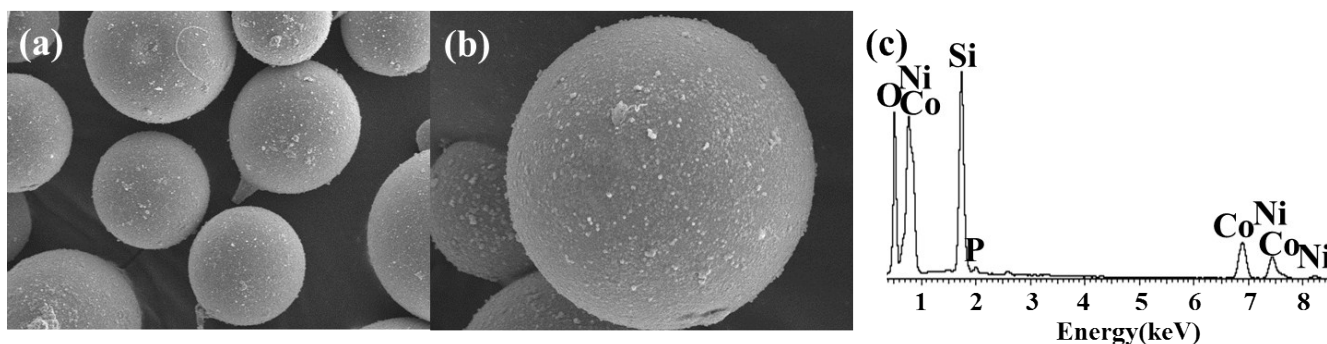

**Fig. S15** (a), (b) SEM images and (c) EDX spectra of the as-obtained  $\text{SiO}_2$ - NiCoP composite hollow particles.

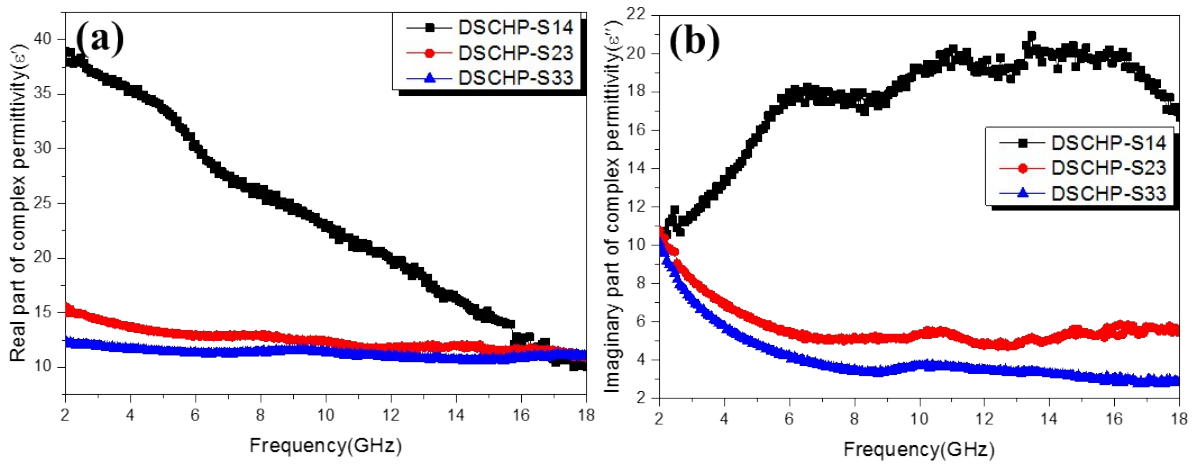

**Fig. S16** The (a) real parts ( $\epsilon'$ ) and (b) imaginary parts ( $\epsilon''$ ) of DSCHP-S14 (black curve), DSCHP-S23 (red curve) and DSCHP-S33 (blue curve).

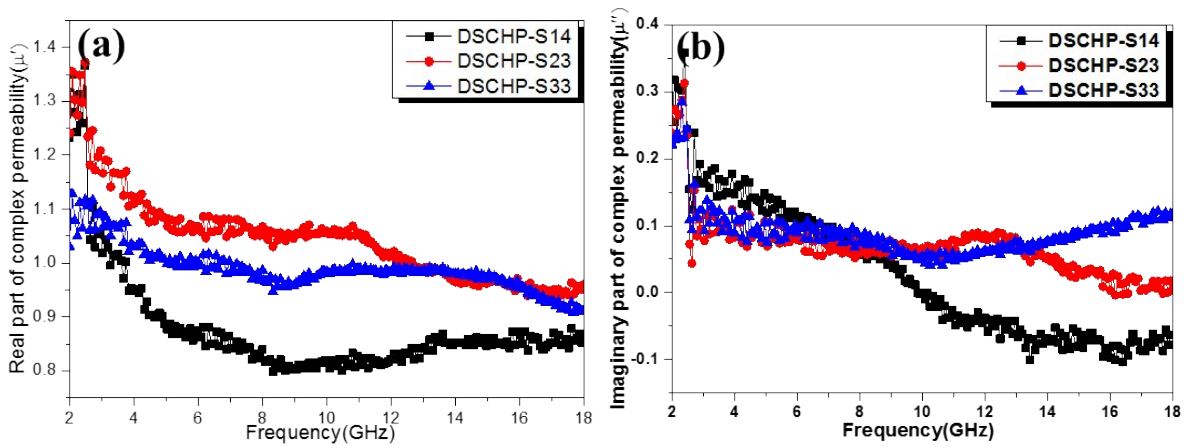

**Fig. S17** The (a) real ( $\mu'$ ) and (b) imaginary ( $\mu''$ ) parts of the permeability of DSCHP-S14 (black curve), DSCHP-S23 (red curve) and DSCHP-S33 (blue curve).

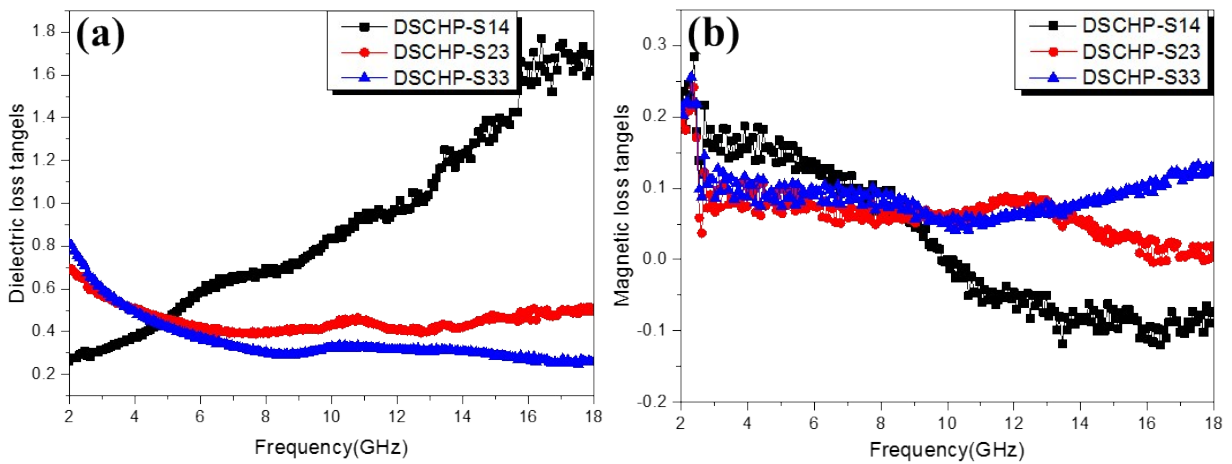

**Fig. S18** Frequency dependences of the (a) dielectric loss tangents, (b) magnetic loss tangents



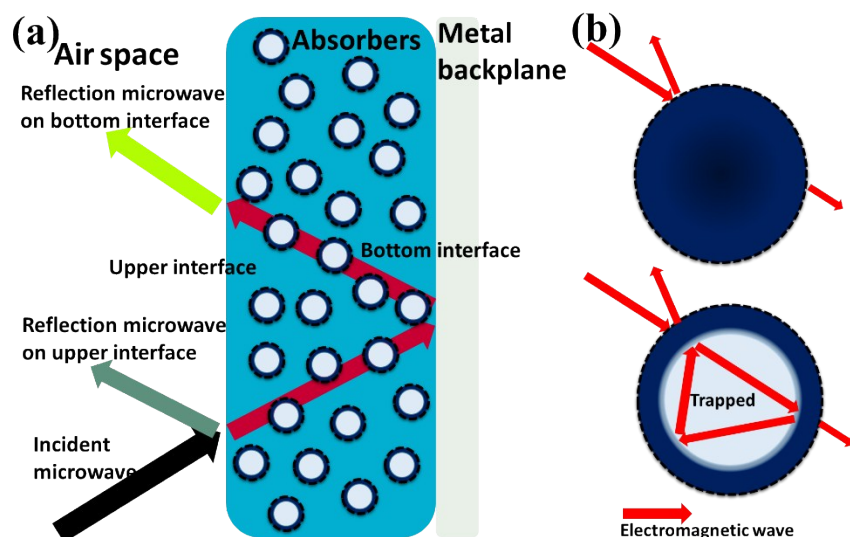

**Fig. S19** The schematic diagram of electromagnetic microwave absorption mechanism for the DCHPs. (a) electromagnetic wave incident to single-layer absorber backed by a metal backplane; (b) electromagnetic wave pathway illustration of solid structure and hollow structure.

| Sample                                                                                | Thickness (mm) | RL value (dB) | Bandwidth (RL<-10dB)(GHz) | Content (%) | Reference |
|---------------------------------------------------------------------------------------|----------------|---------------|---------------------------|-------------|-----------|
| Hollow ceramic-barium ferrites composite single shell microspheres                    | 2.5            | -10           | <1                        | 60          | 1         |
| Hollow CoFe <sub>2</sub> O <sub>4</sub> /Co <sub>3</sub> Fe <sub>7</sub> microspheres | 2              | -41.6         | 3                         | 66.7        | 2         |
| CoFe <sub>2</sub> O <sub>4</sub> hollow sphere/graphene                               | 2              | -18.5         | 3.7                       | 60          | 3         |
| Co <sub>3</sub> Fe <sub>7</sub> /C nanoparticle                                       | 1.8            | -26.8         | 2                         | 50          | 4         |
| FeCo/Graphene nanoparticle                                                            | 2.5            | -40.2         | 4                         | 60          | 5         |
| Hollow glass/nickel flowers microspheres                                              | 3.5            | -15           | 0.8                       | 30          | 6         |
| NiCoP hollow spheres                                                                  | 2.5            | -41.7         | 2                         | 40          | 7         |
| Silica@Iron microcubes                                                                | 4.5            | -54           | 1.5                       | 55          | 8         |
| Ni-15%Fe coated microspheres                                                          | 5              | -25           | <1                        | 50          | 9         |
| Co-Co <sub>3</sub> O <sub>4</sub> hybrid hollow sphere                                | 5              | -18.5         | <1                        | 30          | 10        |
| C@Ni-NiO solid sphere                                                                 | 5              | -10           | <1                        | 30          | 11        |
| Hollow glass/Ni thin film                                                             | 3              | -35           | 1                         | 37.5        | 12        |
| DSCHPs-S23                                                                            | 1.75           | -16.46        | 3.2                       | 30          | This work |
| DSCHPs-S33                                                                            | 1.5            | -45.9         | 4                         | 30          | This work |

**Table S2.** The electromagnetic absorption properties of similar samples

## Reference

- 1 X. Cai, J. Wang, R. Yang, C. Xiong, H. Lou, *Int. J. Appl. Ceram. Technol.*, 2015, **12**, 8.
- 2 W. Li, L. Wang, G. Li, Y. Xu, *J. Magn. Magn. Mater.*, 2015, **377**, 259.
- 3 M. Fu, Q. Jiao, Y. Zhao, H. Li, *J. Mater. Chem. A*, 2014, **2**, 735.
- 4 X. D. Guo, X. J. Qiao, Q. G. Ren, X. Wan, W. C. Li, Z. G. Sun, *Appl. Phys. A*, 2015, **120**, 43.
- 5 X. Li, J. Feng, Y. Du, J. Bai, H. Fan, H. Zhang, Y. Peng, F. Li, *J. Mater. Chem. A*, 2015, **3**, 5535.
- 6 Z. An, S. Pan, J. Zhang, *J. Phys. Chem. C*, 2009, **113**, 2715.
- 7 Z. Li, Y. Deng, B. Shen, L. Liu, W. Hu, *J. Alloy. Compd.*, 2010, **491**, 406.
- 8 Z. Yang, Z. Li, L. Yu, Y. Yang, Z. Xu, *J. Mater. Chem. C*, 2014, **2**, 7583.
- 9 S. T. Kim, S. S. Kim, *J. Appl. Phys.*, 2014, **115**, 17A528.
- 10 H. Wu, Q. Wu, L. Wang, *Mater. Character.*, 2015, **103**, 1.
- 11 H. Wu, G. Wu, Q. Wu, L. Wang, *Mater. Character.*, Wang, 2014, **97**, 18.
- 12 Z. W. Liu, L. X. Phua, Y. Liu, C. K. Ong, *J. Appl. Phys.*, 2006, **100**, 093902.

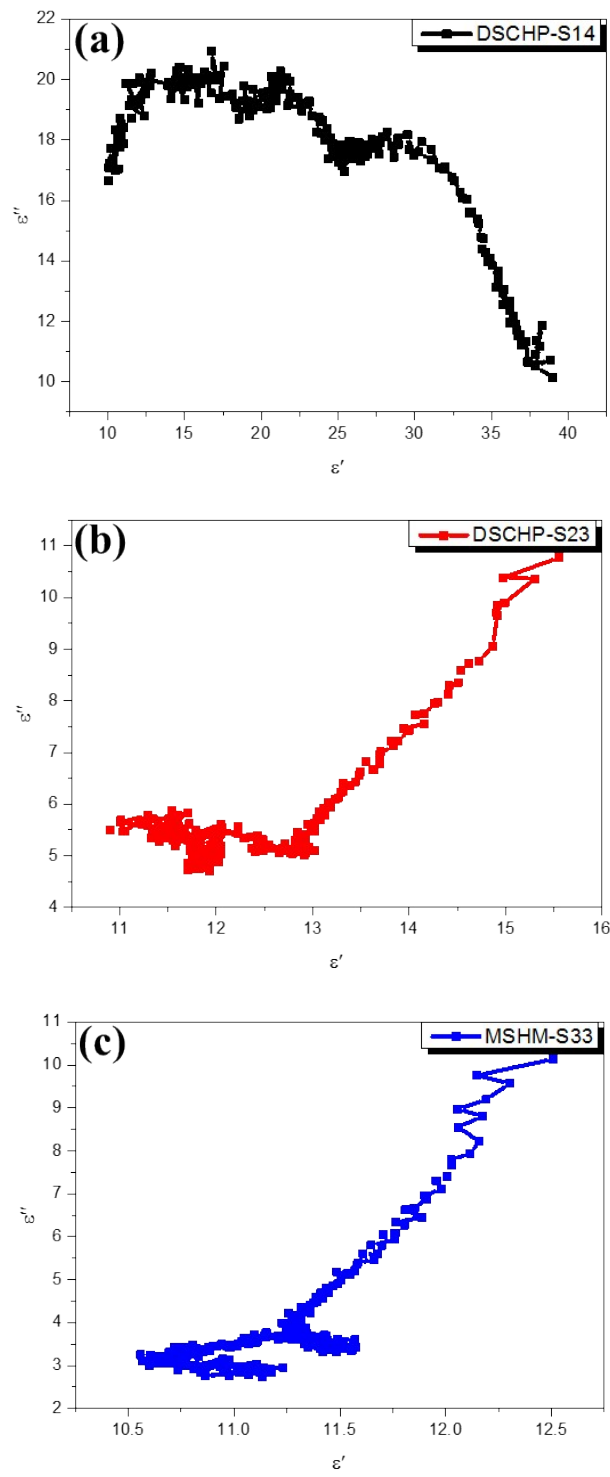

**Fig. S20** Typical Cole-Cole semicircles for (a) DSCHP-S14, (b) DSCHP-S23 and (c) DSCHP-S33.
